# Supplementary material for: Fluorinated graphene based electrodes for high performance primary lithium batteries
Source: Royal Society of Chemistry journal article supplement (doi:10.1039/c3ra45377d), 2013-01-01
Supplement: c3ra45377d.pdf [file c3ra45377d.pdf]

## **Electronic Supplementary Information**

### **Fluorinated graphene -based high performance electrodes for primary lithium batteries**

*Dijo Damien,<sup>a</sup> Parambath M. Sudeep,<sup>a,b</sup> Tharangattu N. Narayanan,<sup>c</sup> Maleimadam R.  
Anantharaman,<sup>b</sup> Pulickel M. Ajayan,<sup>\*d</sup> and Manikoth M. Shaijumon<sup>\*a</sup>*

<sup>a</sup> Indian Institute of Science Education and Research Thiruvananthapuram,  
Thiruvananthapuram, Kerala, 695016, India.

<sup>b</sup> Department of Physics, Cochin University of Science and Technology, Cochin, Kerala,  
India.

<sup>c</sup> CSIR-Central ElectroChemical Research Institute, Karaikudi-630 006, Tamilnadu, India.

<sup>d</sup> Department of Mechanical Engineering and Materials Science, Rice University, Houston,  
Texas 77005, USA

#### **Corresponding Author**

\*E-mail: [ajayan@rice.edu](mailto:ajayan@rice.edu); [shaiju@iisertvm.ac.in](mailto:shaiju@iisertvm.ac.in)

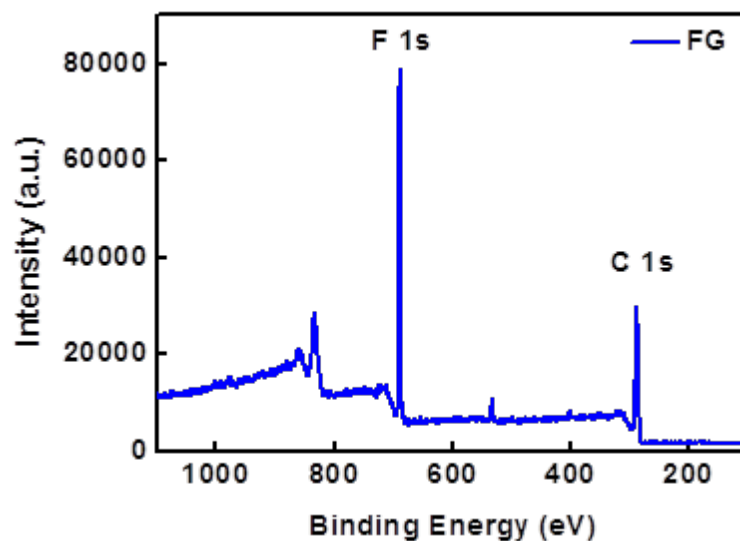

Fig. S1 Survey XPS spectra of FG.

### Calculation of Empirical formula of FG:

| Data Set | Name | Position | FWHM   | R.S.F. | Area       | % Conc. |
|----------|------|----------|--------|--------|------------|---------|
| 1        | C 1s | 288.8560 | 1.9854 | 1      | 121955.039 | 72.03   |
|          | F 1s | 687.3560 | 2.1490 | 4.43   | 187652.108 | 25.02   |
|          | O 1s | 531.8560 | 3.5270 | 2.93   | 14642.816  | 2.95    |

C-72.03 %

Mole Fraction of Carbon =  $72.03/12.01$   
= 5.997

F- 25.02 %

Mole Fraction of Fluorine =  $25.02/18.99$   
= 1.317

O- 2.95 %

Mole Fraction of Fluorine =  $2.95/16$   
= 0.184375

$C_{5.997}O_{0.184}F_{1.317}$

Dividing all by 5.997 gives the formula-  $CO_{0.03}F_{0.22}$

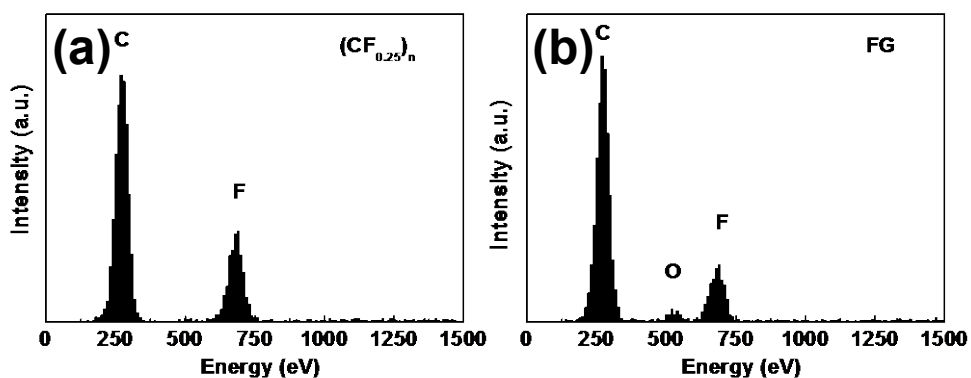

**Fig. S2** EDX spectra of  $(CF_{0.25})_n$  and FG, showing the presence of slight oxidation and reduced F content in FG.

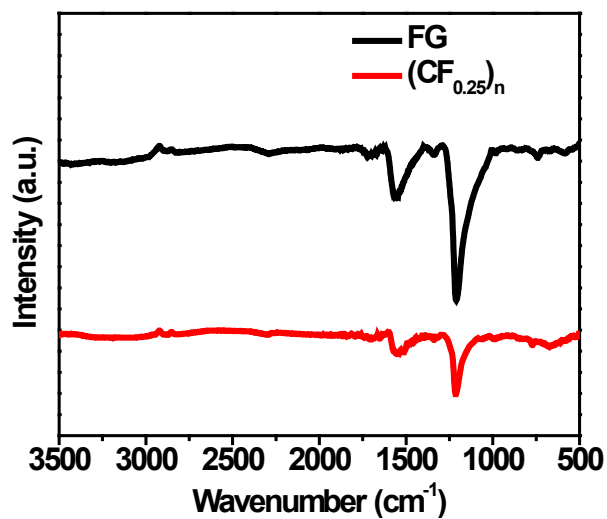

**Fig. S3** FT-IR spectra of FG and  $(CF_{0.25})_n$

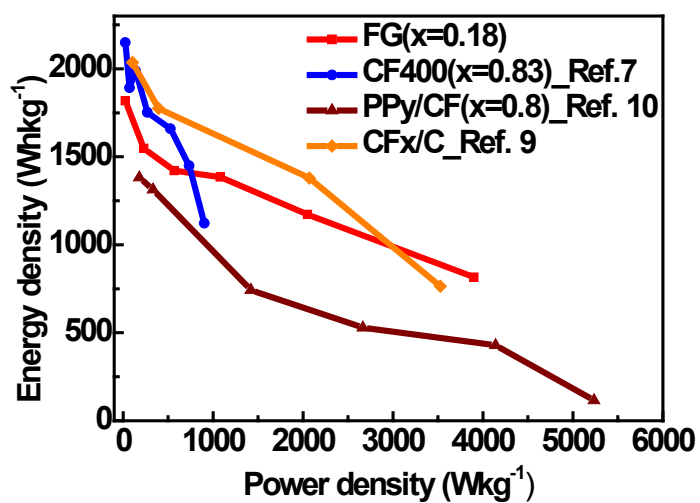

**Fig. S4** Electrochemical performance of fluorinated graphene-based electrodes is compared with various (CF<sub>x</sub>)<sub>n</sub> systems reported. Different strategies have been undertaken to achieve enhanced performance in either power density or energy density for the (CF<sub>x</sub>)<sub>n</sub> systems. FG-based electrodes show improvements in both power density and energy density, along with exceptional Faradic yield, all in a single step.

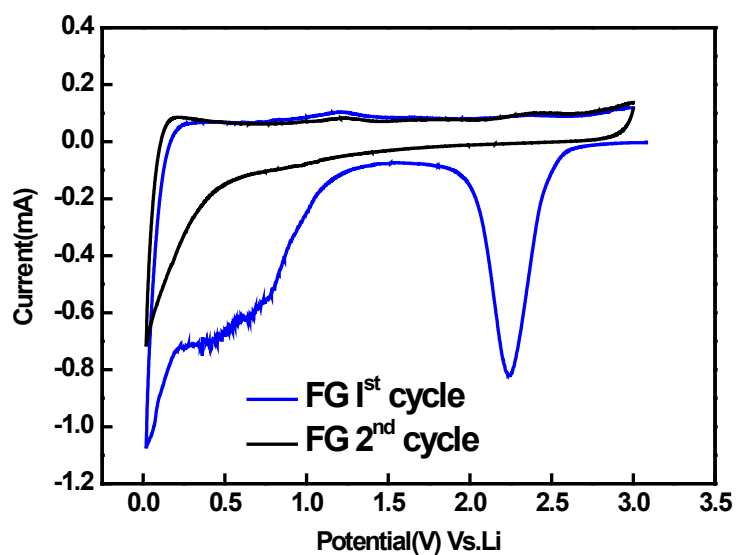

**Fig. S5** Cyclic Voltammogram of FG electrode at a scan rate of  $0.02\text{mVs}^{-1}$  showing the discharge process by LiF formation. Single reduction peak also rules out the possibilities of unexpected side reactions which may contribute to the enhanced specific capacity.

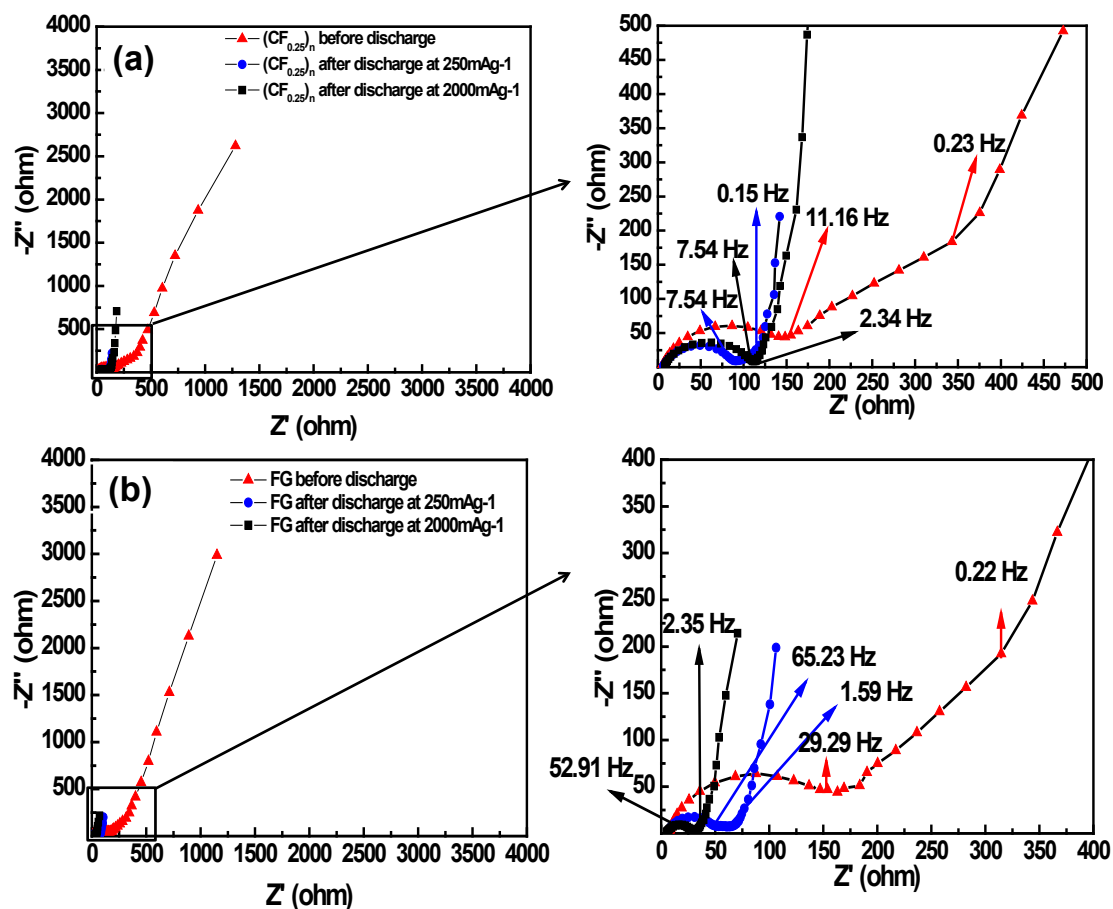

**Fig. S6** Electrochemical impedance spectra of (a) parent  $(CF_{0.25})_n$  and (b) FG electrodes before and after discharging at the specified current rates.
